# Supplementary material
Source: publisher site journal article supplement (https://www.spandidos-publications.com/3683/downloadSupplementary)

Figure S1. DSCAM-AS1 is highly expressed in EC tissues compared with normal tissues according to The Cancer Genome Atlas data. DSCAM-AS1, down syndrome cell adhesion molecule antisense 1; EC, endometrial cancer; UCEC, uterine corpus endometrial carcinoma.

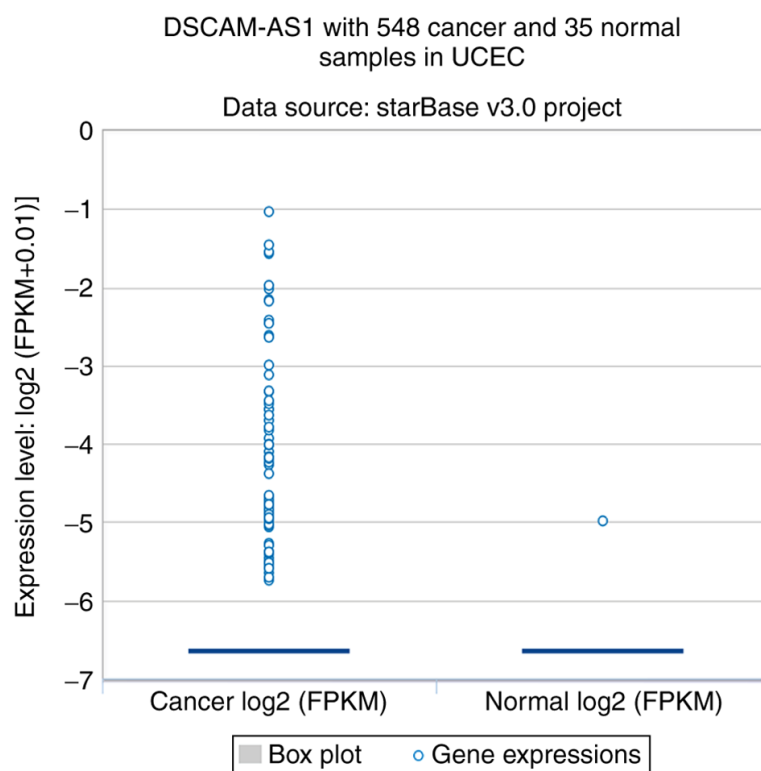

Supplement: Supplementary file 1 [file downloadSupplementary]
